# Supplementary material for: A Novel NKX2-5 Variant in a Child with Left Ventricular Noncompaction, Atrial Septal Defect, Atrioventricular Conduction Disorder, and Syncope
Source: MDPI journal article supplement (doi:10.3390/jcm11113171), 2022-06-02
Supplement: s1 [file s1]

## Supplementary Appendix

### Methods

#### Mutation screening

After obtaining informed consent from a patient's parents, DNA was isolated from a sample of whole blood or heart tissue. NGS of 182 cardiac disorder-related genes associated with cardiomyopathies and channelopathies (Table S1) was performed using an Ion PGM System (Life Technologies, Carlsbad, CA, USA).

This custom panel utilized two separate PCR primer pools, yielding a total of 1,870 amplicons and used to generate target amplicon libraries. Genomic DNA samples were PCR-amplified using the custom panel and an Ion AmpliSeq Library Kit v2.0 (Life Technologies, Carlsbad, CA, USA). Individual samples were labeled using an Ion Xpress Barcode Adapters Kit (Life Technologies) and then pooled at equimolar concentrations. Emulsion PCR and ion sphere particle (ISP) enrichment were performed using the Ion PGM Hi-Q OT2 Kit (Life Technologies), according to the manufacturer's instructions. ISPs were loaded onto a 316 chip and sequenced using an Ion PGM Hi-Q Sequencing Kit (Life Technologies).

#### Sanger sequencing

For all candidate pathogenic variants that passed these selection criteria, Sanger sequencing was used to validate the NGS results. For this, the nucleotide sequences of amplified fragments were analyzed by direct sequencing in both directions by using the BigDye Terminator v3.1 Cycle Sequencing Kit (Applied Biosystems, Foster City, CA) and sequence analysis was performed using an ABI 3130xl automated sequencer (Applied Biosystems).

#### Data analysis and variant classification

Torrent Suite and Ion Reporter Software 5.0 (Life Technologies) were used to perform primary, secondary, and tertiary analyses, including optimized signal processing, base calling, sequence alignment, and variant analysis.

The allelic frequency of all detected variants was determined using the Exome Aggregation Consortium (ExAC) database and Human Genetic Variation Database (HGVD), which contain data of 1,208 Japanese individuals. All variants with a minor allelic frequency of  $\geq 0.005$  in the ExAC and HGVD populations were excluded. To evaluate the pathogenicity of the remaining variants, we utilized seven different *in silico* predictive algorithms: FATHMM, SIFT, PROVEAN, Align GVGD, MutationTaster2, PolyPhen-2, and CADD (Table S2). Variants predicted to be deleterious or pathogenic by at least five of the seven *in silico* algorithms were considered likely pathogenic.

**Table S1. List of 182 analyzed genes of NGS.**

| Gene            | Chromosome    | NCBI Reference Sequence: | Sequence : (Start..End)                         |                                                                                                 |
|-----------------|---------------|--------------------------|-------------------------------------------------|-------------------------------------------------------------------------------------------------|
| <i>ABCC9</i>    | 12p12.1       | NG_012819.1              | NC_000012.11 (21950323..22094797, complement)   | <a href="http://www.ncbi.nlm.nih.gov/gene/10060">http://www.ncbi.nlm.nih.gov/gene/10060</a>     |
| <i>ACAD9</i>    | 3q21.3        | NG_017064.1              | NC_000003.12 (128879490..128913114)             | <a href="https://www.ncbi.nlm.nih.gov/gene/28976">https://www.ncbi.nlm.nih.gov/gene/28976</a>   |
| <i>ACADVL</i>   | 17p13.1       | NG_007975.1              | NC_000017.11 (7217125..7225267)                 | <a href="https://www.ncbi.nlm.nih.gov/gene/37">https://www.ncbi.nlm.nih.gov/gene/37</a>         |
| <i>ACTC1</i>    | 15q14         | NG_007553.1              | NC_000015.9 (35080297..35087927, complement)    | <a href="http://www.ncbi.nlm.nih.gov/gene/70">http://www.ncbi.nlm.nih.gov/gene/70</a>           |
| <i>ACTN2</i>    | 1q42-q43      | NG_009081.1              | NC_000001.10 (236849754..236927931)             | <a href="http://www.ncbi.nlm.nih.gov/gene/88">http://www.ncbi.nlm.nih.gov/gene/88</a>           |
| <i>ADAMTS1</i>  | 21q21.3       | NC_000021.9              | NC_000021.9 (26836287..26845409, complement)    | <a href="https://www.ncbi.nlm.nih.gov/gene/9510">https://www.ncbi.nlm.nih.gov/gene/9510</a>     |
| <i>ADAMTS9</i>  | 3p14.1        | NC_000003.12             | NC_000003.12 (64515654..64688000, complement)   | <a href="https://www.ncbi.nlm.nih.gov/gene/56999">https://www.ncbi.nlm.nih.gov/gene/56999</a>   |
| <i>ADCK3</i>    | 1q42.13       | NG_012825.2              | NC_000001.11 (226939339..226987545)             | <a href="https://www.ncbi.nlm.nih.gov/gene/56997">https://www.ncbi.nlm.nih.gov/gene/56997</a>   |
| <i>AKAP9</i>    | 7q21-q22      | NG_011623.1              | NC_000007.13 (91570181..91739987)               | <a href="http://www.ncbi.nlm.nih.gov/gene/10142">http://www.ncbi.nlm.nih.gov/gene/10142</a>     |
| <i>AMPD1</i>    | 1p13.2        | NG_008012.1              | NC_000001.11 (114673098..114695618, complement) | <a href="https://www.ncbi.nlm.nih.gov/gene/270">https://www.ncbi.nlm.nih.gov/gene/270</a>       |
| <i>ANK2</i>     | 4q25-q27      | NG_009006.2              | NC_000004.11 (113739239..114304896)             | <a href="http://www.ncbi.nlm.nih.gov/gene/287">http://www.ncbi.nlm.nih.gov/gene/287</a>         |
| <i>ARFGEF2</i>  | 20q13.13      | NG_011490.1              | NC_000020.11 (48921721..49036693)               | <a href="https://www.ncbi.nlm.nih.gov/gene/10564">https://www.ncbi.nlm.nih.gov/gene/10564</a>   |
| <i>BAG3</i>     | 10q25.2-q26.2 | NG_016125.1              | NC_000010.10 (121410859..121437331)             | <a href="http://www.ncbi.nlm.nih.gov/gene/9531">http://www.ncbi.nlm.nih.gov/gene/9531</a>       |
| <i>BMP10</i>    | 2p13.3        | NG_032117.1              | NC_000002.12 (68860916..68871517, complement)   | <a href="https://www.ncbi.nlm.nih.gov/gene/27302">https://www.ncbi.nlm.nih.gov/gene/27302</a>   |
| <i>BMPRIA</i>   | 10q22.3       | NG_009362.1              | NC_000010.10 (88516396..88684945)               | <a href="http://www.ncbi.nlm.nih.gov/gene/657">http://www.ncbi.nlm.nih.gov/gene/657</a>         |
| <i>BOLA3</i>    | 2p13.1        | NG_031910.1              | NC_000002.12 (74135401..74147912, complement)   | <a href="https://www.ncbi.nlm.nih.gov/gene/388962">https://www.ncbi.nlm.nih.gov/gene/388962</a> |
| <i>BRAF</i>     | 7q34          | NG_007873.3              | NC_000007.14 (140719327..140924928, complement) | <a href="https://www.ncbi.nlm.nih.gov/gene/673">https://www.ncbi.nlm.nih.gov/gene/673</a>       |
| <i>C10orf2</i>  | 10q24.31      | NG_012624.1              | NC_000010.11 (100987527..100994403)             | <a href="https://www.ncbi.nlm.nih.gov/gene/56652">https://www.ncbi.nlm.nih.gov/gene/56652</a>   |
| <i>CACNA1C</i>  | 12p13.3       | NG_008801.2              | NC_000012.11 (2079952..2807115)                 | <a href="http://www.ncbi.nlm.nih.gov/gene/775">http://www.ncbi.nlm.nih.gov/gene/775</a>         |
| <i>CACNA2D1</i> | 7q21.11       | NC_000007.14             | NC_000007.14 (81946444..82443806, complement)   | <a href="https://www.ncbi.nlm.nih.gov/gene/781">https://www.ncbi.nlm.nih.gov/gene/781</a>       |
| <i>CACNB2</i>   | 10p12         | NG_016195.1              | NC_000010.10 (18429373..18830688)               | <a href="http://www.ncbi.nlm.nih.gov/gene/783">http://www.ncbi.nlm.nih.gov/gene/783</a>         |
| <i>CALR3</i>    | 19p13.11      | NG_031959.2              | NC_000019.9 (16589767..16607015, complement)    | <a href="http://www.ncbi.nlm.nih.gov/gene/125972">http://www.ncbi.nlm.nih.gov/gene/125972</a>   |
| <i>CAPN3</i>    | 15q15.1       | NG_008660.1              | NC_000015.9 (42646545..42704515)                | <a href="http://www.ncbi.nlm.nih.gov/gene/825">http://www.ncbi.nlm.nih.gov/gene/825</a>         |
| <i>CASQ2</i>    | 1p13.1        | NG_008802.1              | NC_000001.11 (115700003..115768805, complement) | <a href="https://www.ncbi.nlm.nih.gov/gene/845">https://www.ncbi.nlm.nih.gov/gene/845</a>       |
| <i>CASZ1</i>    | 1p36.22       | NC_000001.11             | NC_000001.11 (10636604..10796676, complement)   | <a href="https://www.ncbi.nlm.nih.gov/gene/54897">https://www.ncbi.nlm.nih.gov/gene/54897</a>   |

|                |          |              |                                                 |                                                                                                 |
|----------------|----------|--------------|-------------------------------------------------|-------------------------------------------------------------------------------------------------|
| <i>CAV3</i>    | 3p25     | NG_008797.2  | NC_000003.11 (8775486..8788451)                 | <a href="http://www.ncbi.nlm.nih.gov/gene/859">http://www.ncbi.nlm.nih.gov/gene/859</a>         |
| <i>CDKN1C</i>  | 11p15.4  | NG_008022.1  | NC_000011.10 (2883218..2885804, complement)     | <a href="https://www.ncbi.nlm.nih.gov/gene/1028">https://www.ncbi.nlm.nih.gov/gene/1028</a>     |
| <i>COL4A1</i>  | 13q34    | NG_011544.1  | NC_000013.10 (110801310..110959496, complement) | <a href="http://www.ncbi.nlm.nih.gov/gene/1282">http://www.ncbi.nlm.nih.gov/gene/1282</a>       |
| <i>COL7A1</i>  | 3p21.31  | NG_007065.1  | NC_000003.12 (48564073..48595302, complement)   | <a href="https://www.ncbi.nlm.nih.gov/gene/1294">https://www.ncbi.nlm.nih.gov/gene/1294</a>     |
| <i>CPT2</i>    | 1p32.3   | NG_008035.1  | NC_000001.11 (53196429..53214197)               | <a href="https://www.ncbi.nlm.nih.gov/gene/1376">https://www.ncbi.nlm.nih.gov/gene/1376</a>     |
| <i>CSRP3</i>   | 11p15.1  | NG_011932.2  | NC_000011.10 (19182030..19210571, complement)   | <a href="https://www.ncbi.nlm.nih.gov/gene/8048">https://www.ncbi.nlm.nih.gov/gene/8048</a>     |
| <i>CTNNA3</i>  | 10q21.3  | NG_034072.1  | NC_000010.11 (65912518..67696217, complement)   | <a href="https://www.ncbi.nlm.nih.gov/gene/29119">https://www.ncbi.nlm.nih.gov/gene/29119</a>   |
| <i>DAAMI1</i>  | 14q23.1  | NG_047127.1  | NC_000014.9 (59188657..59371405)                | <a href="https://www.ncbi.nlm.nih.gov/gene/23002">https://www.ncbi.nlm.nih.gov/gene/23002</a>   |
| <i>DAAM2</i>   | 6p21.2   | NC_000006.12 | NC_000006.12 (39792366..39904877)               | <a href="https://www.ncbi.nlm.nih.gov/gene/23500">https://www.ncbi.nlm.nih.gov/gene/23500</a>   |
| <i>DES</i>     | 2q35     | NG_008043.1  | NC_000002.11 (220283099..220291461)             | <a href="http://www.ncbi.nlm.nih.gov/gene/1674">http://www.ncbi.nlm.nih.gov/gene/1674</a>       |
| <i>DMD</i>     | Xp21.2   | NG_012232.1  | NC_000023.10 (31137345..33357726, complement)   | <a href="http://www.ncbi.nlm.nih.gov/gene/1756">http://www.ncbi.nlm.nih.gov/gene/1756</a>       |
| <i>DMPK</i>    | 19q13.32 | NG_009784.1  | NC_000019.10 (45769709..45782557, complement)   | <a href="https://www.ncbi.nlm.nih.gov/gene/1760">https://www.ncbi.nlm.nih.gov/gene/1760</a>     |
| <i>DNAJC19</i> | 3q26.33  | NG_022933.1  | NC_000003.12 (180983709..180989774, complement) | <a href="https://www.ncbi.nlm.nih.gov/gene/131118">https://www.ncbi.nlm.nih.gov/gene/131118</a> |
| <i>DSC2</i>    | 18q12.1  | NG_008208.1  | NC_000018.9 (28645938..28682388, complement)    | <a href="http://www.ncbi.nlm.nih.gov/gene/1824">http://www.ncbi.nlm.nih.gov/gene/1824</a>       |
| <i>DSG2</i>    | 18q12.1  | NG_007072.3  | NC_000018.9 (29078027..29128814)                | <a href="http://www.ncbi.nlm.nih.gov/gene/1829">http://www.ncbi.nlm.nih.gov/gene/1829</a>       |
| <i>DSP</i>     | 6p24     | NG_008803.1  | NC_000006.11 (7541808..7586946)                 | <a href="http://www.ncbi.nlm.nih.gov/gene/1832">http://www.ncbi.nlm.nih.gov/gene/1832</a>       |
| <i>DTNA</i>    | 18q12.1  | NG_009201.1  | NC_000018.10 (34493290..34891844)               | <a href="https://www.ncbi.nlm.nih.gov/gene/1837">https://www.ncbi.nlm.nih.gov/gene/1837</a>     |
| <i>DVL1</i>    | 1p36.33  | NG_008048.1  | NC_000001.11 (1335278..1349142, complement)     | <a href="https://www.ncbi.nlm.nih.gov/gene/1855">https://www.ncbi.nlm.nih.gov/gene/1855</a>     |
| <i>EED</i>     | 11q14.2  | NG_029595.1  | NC_000011.10 (86244384..86285420)               | <a href="https://www.ncbi.nlm.nih.gov/gene/8726">https://www.ncbi.nlm.nih.gov/gene/8726</a>     |
| <i>ELN</i>     | 7q11.23  | NG_009261.1  | NC_000007.13 (73442119..73484237)               | <a href="http://www.ncbi.nlm.nih.gov/gene/2006">http://www.ncbi.nlm.nih.gov/gene/2006</a>       |
| <i>EMD</i>     | Xq28     | NG_008677.1  | NC_000023.10 (153607597..153609883)             | <a href="http://www.ncbi.nlm.nih.gov/gene/2010">http://www.ncbi.nlm.nih.gov/gene/2010</a>       |
| <i>ERBB2</i>   | 17q12    | NG_007503.1  | NC_000017.11 (39688084..39728662)               | <a href="https://www.ncbi.nlm.nih.gov/gene/2064">https://www.ncbi.nlm.nih.gov/gene/2064</a>     |
| <i>ERBB4</i>   | 2q34     | NG_011805.1  | NC_000002.12 (211375717..212538628, complement) | <a href="https://www.ncbi.nlm.nih.gov/gene/2066">https://www.ncbi.nlm.nih.gov/gene/2066</a>     |
| <i>EZH2</i>    | 7q36.1   | NG_032043.1  | NC_000007.14 (148807372..148884349, complement) | <a href="https://www.ncbi.nlm.nih.gov/gene/2146">https://www.ncbi.nlm.nih.gov/gene/2146</a>     |
| <i>FBN2</i>    | 5q23.3   | NG_008750.1  | NC_000005.10 (128257909..128538042, complement) | <a href="https://www.ncbi.nlm.nih.gov/gene/2201">https://www.ncbi.nlm.nih.gov/gene/2201</a>     |
| <i>FGF16</i>   | Xq21.1   | NG_034050.1  | NC_000023.11 (77447675..77456522)               | <a href="https://www.ncbi.nlm.nih.gov/gene/8823">https://www.ncbi.nlm.nih.gov/gene/8823</a>     |
| <i>FGF9</i>    | 13q12.11 | NG_016272.1  | NC_000013.11 (21671076..21704501)               | <a href="https://www.ncbi.nlm.nih.gov/gene/2254">https://www.ncbi.nlm.nih.gov/gene/2254</a>     |

|               |               |              |                                                 |                                                                                               |
|---------------|---------------|--------------|-------------------------------------------------|-----------------------------------------------------------------------------------------------|
| <i>FGFR1</i>  | 8p11.23       | NG_007729.1  | NC_000008.11 (38411138..38468834, complement)   | <a href="https://www.ncbi.nlm.nih.gov/gene/2260">https://www.ncbi.nlm.nih.gov/gene/2260</a>   |
| <i>FGFR2</i>  | 10q26.13      | NG_012449.2  | NC_000010.11 (121478330..121598458, complement) | <a href="https://www.ncbi.nlm.nih.gov/gene/2263">https://www.ncbi.nlm.nih.gov/gene/2263</a>   |
| <i>FKBP1A</i> | 20p13         | NC_000020.11 | NC_000020.11 (1368977..1393172, complement)     | <a href="https://www.ncbi.nlm.nih.gov/gene/2280">https://www.ncbi.nlm.nih.gov/gene/2280</a>   |
| <i>FKBP1B</i> | 2p23.3        | NC_000002.12 | NC_000002.12 (24033205..24067743)               | <a href="https://www.ncbi.nlm.nih.gov/gene/2281">https://www.ncbi.nlm.nih.gov/gene/2281</a>   |
| <i>FKTN</i>   | 9q31.2        | NG_008754.1  | NC_000009.12 (105558117..105655950)             | <a href="https://www.ncbi.nlm.nih.gov/gene/2218">https://www.ncbi.nlm.nih.gov/gene/2218</a>   |
| <i>FLNA</i>   | Xq28          | NG_011506.1  | NC_000023.11 (154348532..154374638, complement) | <a href="https://www.ncbi.nlm.nih.gov/gene/2316">https://www.ncbi.nlm.nih.gov/gene/2316</a>   |
| <i>FXN</i>    | 9q21.11       | NG_008845.2  | NC_000009.12 (69035563..69079077)               | <a href="https://www.ncbi.nlm.nih.gov/gene/2395">https://www.ncbi.nlm.nih.gov/gene/2395</a>   |
| <i>GAA</i>    | 17q25.2-q25.3 | NG_009822.1  | NC_000017.10 (78075339..78093680)               | <a href="http://www.ncbi.nlm.nih.gov/gene/2548">http://www.ncbi.nlm.nih.gov/gene/2548</a>     |
| <i>GATA4</i>  | 8p23.1-p22    | NG_008177.1  | NC_000008.10 (11534433..11617510)               | <a href="http://www.ncbi.nlm.nih.gov/gene/2626">http://www.ncbi.nlm.nih.gov/gene/2626</a>     |
| <i>GBE1</i>   | 3p12.2        | NG_011810.1  | NC_000003.12 (81489699..81761799, complement)   | <a href="https://www.ncbi.nlm.nih.gov/gene/2632">https://www.ncbi.nlm.nih.gov/gene/2632</a>   |
| <i>GFRA1</i>  | 10q25.3       | NG_050620.1  | NC_000010.11 (116056925..116273645, complement) | <a href="https://www.ncbi.nlm.nih.gov/gene/2674">https://www.ncbi.nlm.nih.gov/gene/2674</a>   |
| <i>GFRA2</i>  | 8p21.3        | NG_029215.1  | NC_000008.11 (21690403..21789296, complement)   | <a href="https://www.ncbi.nlm.nih.gov/gene/2675">https://www.ncbi.nlm.nih.gov/gene/2675</a>   |
| <i>GLA</i>    | Xq22          | NG_007119.1  | NC_000023.10 (100652779..100663001, complement) | <a href="http://www.ncbi.nlm.nih.gov/gene/2717">http://www.ncbi.nlm.nih.gov/gene/2717</a>     |
| <i>GPD1L</i>  | 3p22.3        | NG_023375.1  | NC_000003.11 (32148003..32210207)               | <a href="http://www.ncbi.nlm.nih.gov/gene/23171">http://www.ncbi.nlm.nih.gov/gene/23171</a>   |
| <i>HADHA</i>  | 2p23.3        | NG_007121.1  | NC_000002.12 (26190635..26244726, complement)   | <a href="https://www.ncbi.nlm.nih.gov/gene/3030">https://www.ncbi.nlm.nih.gov/gene/3030</a>   |
| <i>HAS2</i>   | 8q24.13       | NC_000008.11 | NC_000008.11 (121613031..121641390, complement) | <a href="https://www.ncbi.nlm.nih.gov/gene/3037">https://www.ncbi.nlm.nih.gov/gene/3037</a>   |
| <i>HBB</i>    | 11p15.4       | NG_059281.1  | NC_000011.10 (5225466..5227071, complement)     | <a href="https://www.ncbi.nlm.nih.gov/gene/3043">https://www.ncbi.nlm.nih.gov/gene/3043</a>   |
| <i>HCCS</i>   | Xp22.2        | NG_016460.1  | NC_000023.11 (11111286..11123086)               | <a href="https://www.ncbi.nlm.nih.gov/gene/3052">https://www.ncbi.nlm.nih.gov/gene/3052</a>   |
| <i>HCN4</i>   | 15q24.1       | NG_009063.1  | NC_000015.9 (73612200..73661605, complement)    | <a href="http://www.ncbi.nlm.nih.gov/gene/10021">http://www.ncbi.nlm.nih.gov/gene/10021</a>   |
| <i>HEY2</i>   | 6q22.31       | NC_000006.12 | NC_000006.12 (125747639..125762243)             | <a href="https://www.ncbi.nlm.nih.gov/gene/23493">https://www.ncbi.nlm.nih.gov/gene/23493</a> |
| <i>HMGCL</i>  | 1p36.11       | NG_013061.1  | NC_000001.11 (23801877..23825459, complement)   | <a href="https://www.ncbi.nlm.nih.gov/gene/3155">https://www.ncbi.nlm.nih.gov/gene/3155</a>   |
| <i>ITGA7</i>  | 12q13.2       | NG_012343.1  | NC_000012.12 (55684568..55716037, complement)   | <a href="https://www.ncbi.nlm.nih.gov/gene/3679">https://www.ncbi.nlm.nih.gov/gene/3679</a>   |
| <i>JARID2</i> | 6p22.3        | NC_000006.12 | NC_000006.12 (15245975..15522042)               | <a href="https://www.ncbi.nlm.nih.gov/gene/3720">https://www.ncbi.nlm.nih.gov/gene/3720</a>   |
| <i>JUP</i>    | 17q21         | NG_009090.2  | NC_000017.10 (39910859..39942964, complement)   | <a href="http://www.ncbi.nlm.nih.gov/gene/3728">http://www.ncbi.nlm.nih.gov/gene/3728</a>     |
| <i>KCNE1</i>  | 21q22.12      | NG_009091.1  | NC_000021.8 (35790910..35884573, complement)    | <a href="http://www.ncbi.nlm.nih.gov/gene/3753">http://www.ncbi.nlm.nih.gov/gene/3753</a>     |
| <i>KCNE2</i>  | 21q22.12      | NG_008804.1  | NC_000021.8 (35736323..35743440)                | <a href="http://www.ncbi.nlm.nih.gov/gene/9992">http://www.ncbi.nlm.nih.gov/gene/9992</a>     |
| <i>KCNE3</i>  | 11q13.4       | NG_011833.1  | NC_000011.9 (74165886..74178600, complement)    | <a href="http://www.ncbi.nlm.nih.gov/gene/10008">http://www.ncbi.nlm.nih.gov/gene/10008</a>   |

|               |               |             |                                                 |                                                                                               |
|---------------|---------------|-------------|-------------------------------------------------|-----------------------------------------------------------------------------------------------|
| <i>KCNH2</i>  | 7q36.1        | NG_008916.1 | NC_000007.13 (150642044..150675402, complement) | <a href="http://www.ncbi.nlm.nih.gov/gene/3757">http://www.ncbi.nlm.nih.gov/gene/3757</a>     |
| <i>KCNJ2</i>  | 17q24.3       | NG_008798.1 | NC_000017.10 (68164757..68176189)               | <a href="http://www.ncbi.nlm.nih.gov/gene/3759">http://www.ncbi.nlm.nih.gov/gene/3759</a>     |
| <i>KCNQ1</i>  | 11p15.5       | NG_008935.1 | NC_000011.9 (2466221..2870340)                  | <a href="http://www.ncbi.nlm.nih.gov/gene/3784">http://www.ncbi.nlm.nih.gov/gene/3784</a>     |
| <i>KRAS</i>   | 12p12.1       | NG_007524.1 | NC_000012.11 (25358180..25403870, complement)   | <a href="http://www.ncbi.nlm.nih.gov/gene/3845">http://www.ncbi.nlm.nih.gov/gene/3845</a>     |
| <i>LAMP2</i>  | Xq24          | NG_007995.1 | NC_000023.10 (119560003..119603204, complement) | <a href="http://www.ncbi.nlm.nih.gov/gene/3920">http://www.ncbi.nlm.nih.gov/gene/3920</a>     |
| <i>LDB3</i>   | 10q22.3-q23.2 | NG_008876.1 | NC_000010.10 (88426542..88495829)               | <a href="http://www.ncbi.nlm.nih.gov/gene/11155">http://www.ncbi.nlm.nih.gov/gene/11155</a>   |
| <i>LMNA</i>   | 1q22          | NG_008692.2 | NC_000001.10 (156052369..156109880)             | <a href="http://www.ncbi.nlm.nih.gov/gene/4000">http://www.ncbi.nlm.nih.gov/gene/4000</a>     |
| <i>LMX1B</i>  | 9q33.3        | NG_017039.1 | NC_000009.12 (126614443..126701032)             | <a href="https://www.ncbi.nlm.nih.gov/gene/4010">https://www.ncbi.nlm.nih.gov/gene/4010</a>   |
| <i>LRPPRC</i> | 2p21          | NG_008247.1 | NC_000002.12 (43886224..43996005, complement)   | <a href="https://www.ncbi.nlm.nih.gov/gene/10128">https://www.ncbi.nlm.nih.gov/gene/10128</a> |
| <i>MADD</i>   | 11p11.2       | NG_029462.1 | NC_000011.10 (47269376..47330031)               | <a href="https://www.ncbi.nlm.nih.gov/gene/8567">https://www.ncbi.nlm.nih.gov/gene/8567</a>   |
| <i>MBL2</i>   | 10q21.1       | NG_008196.1 | NC_000010.11 (52764977..52772847, complement)   | <a href="https://www.ncbi.nlm.nih.gov/gene/4153">https://www.ncbi.nlm.nih.gov/gene/4153</a>   |
| <i>MED1</i>   | 17q12         | NG_046996.1 | NC_000017.11 (39404285..39451281, complement)   | <a href="https://www.ncbi.nlm.nih.gov/gene/5469">https://www.ncbi.nlm.nih.gov/gene/5469</a>   |
| <i>MEST</i>   | 7q32.2        | NG_009226.1 | NC_000007.14 (130486175..130506297)             | <a href="https://www.ncbi.nlm.nih.gov/gene/4232">https://www.ncbi.nlm.nih.gov/gene/4232</a>   |
| <i>MIB1</i>   | 18q11.2       | NG_033272.2 | NC_000018.10 (21740793..21870957)               | <a href="https://www.ncbi.nlm.nih.gov/gene/57534">https://www.ncbi.nlm.nih.gov/gene/57534</a> |
| <i>MIPEP</i>  | 13q12.12      | NG_052977.1 | NC_000013.11 (23730189..23889448, complement)   | <a href="https://www.ncbi.nlm.nih.gov/gene/4285">https://www.ncbi.nlm.nih.gov/gene/4285</a>   |
| <i>MLYCD</i>  | 16q23.3       | NG_009079.1 | NC_000016.10 (83899125..83916182)               | <a href="https://www.ncbi.nlm.nih.gov/gene/23417">https://www.ncbi.nlm.nih.gov/gene/23417</a> |
| <i>MMACHC</i> | 1p34.1        | NG_013378.1 | NC_000001.11 (45500184..45511266)               | <a href="https://www.ncbi.nlm.nih.gov/gene/25974">https://www.ncbi.nlm.nih.gov/gene/25974</a> |
| <i>MRPS22</i> | 3q23          | NG_012174.1 | NC_000003.12 (139344014..139357129)             | <a href="https://www.ncbi.nlm.nih.gov/gene/56945">https://www.ncbi.nlm.nih.gov/gene/56945</a> |
| <i>MTO1</i>   | 6q13          | NG_032856.1 | NC_000006.12 (73461731..73501456)               | <a href="https://www.ncbi.nlm.nih.gov/gene/25821">https://www.ncbi.nlm.nih.gov/gene/25821</a> |
| <i>MYBPC3</i> | 11p11.2       | NG_007667.1 | NC_000011.9 (47352957..47374253, complement)    | <a href="http://www.ncbi.nlm.nih.gov/gene/4607">http://www.ncbi.nlm.nih.gov/gene/4607</a>     |
| <i>MYCN</i>   | 2p24.3        | NG_007457.1 | NC_000002.12 (15940438..15947007)               | <a href="https://www.ncbi.nlm.nih.gov/gene/4613">https://www.ncbi.nlm.nih.gov/gene/4613</a>   |
| <i>MYH11</i>  | 16p13.11      | NG_009299.1 | NC_000016.9 (15796992..15950887, complement)    | <a href="http://www.ncbi.nlm.nih.gov/gene/4629">http://www.ncbi.nlm.nih.gov/gene/4629</a>     |
| <i>MYH6</i>   | 14q12         | NG_023444.1 | NC_000014.8 (23849942..23878836, complement)    | <a href="http://www.ncbi.nlm.nih.gov/gene/4624">http://www.ncbi.nlm.nih.gov/gene/4624</a>     |
| <i>MYH7</i>   | 14q12         | NG_007884.1 | NC_000014.8 (23881947..23904870, complement)    | <a href="http://www.ncbi.nlm.nih.gov/gene/4625">http://www.ncbi.nlm.nih.gov/gene/4625</a>     |
| <i>MYH7B</i>  | 20q11.22      | NG_016984.2 | NC_000020.11 (34955835..35002437)               | <a href="https://www.ncbi.nlm.nih.gov/gene/57644">https://www.ncbi.nlm.nih.gov/gene/57644</a> |
| <i>MYL2</i>   | 12q24.11      | NG_007554.1 | NC_000012.11 (111348623..111358404, complement) | <a href="http://www.ncbi.nlm.nih.gov/gene/4633">http://www.ncbi.nlm.nih.gov/gene/4633</a>     |
| <i>MYL3</i>   | 3p21.3-p21.2  | NG_007555.2 | NC_000003.11 (46899357..46904973, complement)   | <a href="http://www.ncbi.nlm.nih.gov/gene/4634">http://www.ncbi.nlm.nih.gov/gene/4634</a>     |
| <i>MYLK</i>   | 3q21          | NG_029111.1 | NC_000003.11 (123331143..123603149, complement) | <a href="http://www.ncbi.nlm.nih.gov/gene/4638">http://www.ncbi.nlm.nih.gov/gene/4638</a>     |

|                |               |              |                                                 |                                                                                                 |
|----------------|---------------|--------------|-------------------------------------------------|-------------------------------------------------------------------------------------------------|
| <i>MYOZ2</i>   | 4q26-q27      | NG_029747.1  | NC_000004.11 (120056939..120108944)             | <a href="http://www.ncbi.nlm.nih.gov/gene/51778">http://www.ncbi.nlm.nih.gov/gene/51778</a>     |
| <i>NEXN</i>    | 1p31.1        | NG_016625.1  | NC_000001.11 (77888515..77948643)               | <a href="https://www.ncbi.nlm.nih.gov/gene/91624">https://www.ncbi.nlm.nih.gov/gene/91624</a>   |
| <i>NFATC1</i>  | 18q23         | NG_029226.1  | NC_000018.10 (79395772..79529323)               | <a href="https://www.ncbi.nlm.nih.gov/gene/4772">https://www.ncbi.nlm.nih.gov/gene/4772</a>     |
| <i>NKX2-5</i>  | 5q34          | NG_013340.1  | NC_000005.9 (172659107..172662315, complement)  | <a href="http://www.ncbi.nlm.nih.gov/gene/1482">http://www.ncbi.nlm.nih.gov/gene/1482</a>       |
| <i>NNT</i>     | 5p12          | NG_032869.1  | NC_000005.10 (43601092..43705566)               | <a href="https://www.ncbi.nlm.nih.gov/gene/23530">https://www.ncbi.nlm.nih.gov/gene/23530</a>   |
| <i>NR0B1</i>   | Xp21.2        | NG_009814.1  | NC_000023.11 (30304422..30309378, complement)   | <a href="https://www.ncbi.nlm.nih.gov/gene/190">https://www.ncbi.nlm.nih.gov/gene/190</a>       |
| <i>NRAS</i>    | 1p13.2        | NG_007572.1  | NC_000001.10 (115247085..115259515, complement) | <a href="http://www.ncbi.nlm.nih.gov/gene/4893">http://www.ncbi.nlm.nih.gov/gene/4893</a>       |
| <i>NRG1</i>    | 8p12          | NG_012005.2  | NC_000008.11 (31639222..32771716)               | <a href="https://www.ncbi.nlm.nih.gov/gene/3084">https://www.ncbi.nlm.nih.gov/gene/3084</a>     |
| <i>NSD1</i>    | 5q35.3        | NG_009821.1  | NC_000005.10 (177131835..177300213)             | <a href="https://www.ncbi.nlm.nih.gov/gene/64324">https://www.ncbi.nlm.nih.gov/gene/64324</a>   |
| <i>NUMB</i>    | 14q24.2-q24.3 | NG_029061.2  | NC_000014.9 (73275210..73458580, complement)    | <a href="https://www.ncbi.nlm.nih.gov/gene/8650">https://www.ncbi.nlm.nih.gov/gene/8650</a>     |
| <i>NUMBL</i>   | 19q13.2       | NC_000019.10 | NC_000019.10 (40665905..40690658, complement)   | <a href="https://www.ncbi.nlm.nih.gov/gene/9253">https://www.ncbi.nlm.nih.gov/gene/9253</a>     |
| <i>PKP2</i>    | 12p11         | NG_009000.1  | NC_000012.11 (32943680..33049780, complement)   | <a href="http://www.ncbi.nlm.nih.gov/gene/5318">http://www.ncbi.nlm.nih.gov/gene/5318</a>       |
| <i>PLEC</i>    | 8q24.3        | NG_012492.1  | NC_000008.11 (143915147..143976800, complement) | <a href="https://www.ncbi.nlm.nih.gov/gene/5339">https://www.ncbi.nlm.nih.gov/gene/5339</a>     |
| <i>PLEKHM2</i> | 1p36.21       | NG_053033.1  | NC_000001.11 (15681506..15734769)               | <a href="https://www.ncbi.nlm.nih.gov/gene/23207">https://www.ncbi.nlm.nih.gov/gene/23207</a>   |
| <i>PLN</i>     | 6q22.1        | NG_009082.1  | NC_000006.11 (118869442..118881587)             | <a href="http://www.ncbi.nlm.nih.gov/gene/5350">http://www.ncbi.nlm.nih.gov/gene/5350</a>       |
| <i>PMP22</i>   | 17p12         | NG_007949.1  | NC_000017.11 (15229777..15265373, complement)   | <a href="https://www.ncbi.nlm.nih.gov/gene/5376">https://www.ncbi.nlm.nih.gov/gene/5376</a>     |
| <i>POLG</i>    | 15q26.1       | NG_008218.2  | NC_000015.10 (89316305..89334795, complement)   | <a href="https://www.ncbi.nlm.nih.gov/gene/5428">https://www.ncbi.nlm.nih.gov/gene/5428</a>     |
| <i>PRDM16</i>  | 1p36.32       | NG_029576.1  | NC_000001.11 (3068227..3438621)                 | <a href="https://www.ncbi.nlm.nih.gov/gene/63976">https://www.ncbi.nlm.nih.gov/gene/63976</a>   |
| <i>PRKAG2</i>  | 7q36.1        | NG_007486.1  | NC_000007.13 (151253200..151574316, complement) | <a href="http://www.ncbi.nlm.nih.gov/gene/51422">http://www.ncbi.nlm.nih.gov/gene/51422</a>     |
| <i>PTGS2</i>   | 1q31.1        | NG_028206.2  | NC_000001.11 (186671812..186680427, complement) | <a href="https://www.ncbi.nlm.nih.gov/gene/5743">https://www.ncbi.nlm.nih.gov/gene/5743</a>     |
| <i>PTK2</i>    | 8q24.3        | NG_029467.1  | NC_000008.11 (140658382..141002079, complement) | <a href="https://www.ncbi.nlm.nih.gov/gene/5747">https://www.ncbi.nlm.nih.gov/gene/5747</a>     |
| <i>PTPN11</i>  | 12q24         | NG_007459.1  | NC_000012.11 (112856536..112947717)             | <a href="http://www.ncbi.nlm.nih.gov/gene/5781">http://www.ncbi.nlm.nih.gov/gene/5781</a>       |
| <i>RAD54L2</i> | 3p21.2        | NC_000003.12 | NC_000003.12 (51538683..51668660)               | <a href="https://www.ncbi.nlm.nih.gov/gene/23132">https://www.ncbi.nlm.nih.gov/gene/23132</a>   |
| <i>RAF1</i>    | 3p25          | NG_007467.1  | NC_000003.11 (12625100..12705700, complement)   | <a href="http://www.ncbi.nlm.nih.gov/gene/5894">http://www.ncbi.nlm.nih.gov/gene/5894</a>       |
| <i>RANGRF</i>  | 17p13.1       | NG_028189.1  | NC_000017.11 (8288497..8290092)                 | <a href="https://www.ncbi.nlm.nih.gov/gene/29098">https://www.ncbi.nlm.nih.gov/gene/29098</a>   |
| <i>RBM20</i>   | 10q25.2       | NG_021177.1  | NC_000010.11 (110641933..110839471)             | <a href="https://www.ncbi.nlm.nih.gov/gene/282996">https://www.ncbi.nlm.nih.gov/gene/282996</a> |

|                 |           |              |                                                 |                                                                                                 |
|-----------------|-----------|--------------|-------------------------------------------------|-------------------------------------------------------------------------------------------------|
| <i>RIT1</i>     | 1q22      | NG_033885.1  | NC_000001.11 (155897808..155911402, complement) | <a href="https://www.ncbi.nlm.nih.gov/gene/6016">https://www.ncbi.nlm.nih.gov/gene/6016</a>     |
| <i>RPS6KA3</i>  | Xp22.12   | NG_007488.1  | NC_000023.11 (20149911..20267514, complement)   | <a href="https://www.ncbi.nlm.nih.gov/gene/6197">https://www.ncbi.nlm.nih.gov/gene/6197</a>     |
| <i>RPS7</i>     | 2p25      | NG_011744.1  | NC_000002.11 (3622853..3628509)                 | <a href="http://www.ncbi.nlm.nih.gov/gene/6201">http://www.ncbi.nlm.nih.gov/gene/6201</a>       |
| <i>RYR1</i>     | 19q13.2   | NG_008866.1  | NC_000019.10 (38433700..38587564)               | <a href="https://www.ncbi.nlm.nih.gov/gene/6261">https://www.ncbi.nlm.nih.gov/gene/6261</a>     |
| <i>RYR2</i>     | 1q43      | NG_008799.2  | NC_000001.10 (237205510..237997288)             | <a href="http://www.ncbi.nlm.nih.gov/gene/6262">http://www.ncbi.nlm.nih.gov/gene/6262</a>       |
| <i>SCN1B</i>    | 9q13.1    | NG_013359.1  | NC_000019.9 (35521555..35531353)                | <a href="http://www.ncbi.nlm.nih.gov/gene/6324">http://www.ncbi.nlm.nih.gov/gene/6324</a>       |
| <i>SCN3B</i>    | 11q23.3   | NG_016283.1  | NC_000011.9 (123499895..123525315, complement)  | <a href="http://www.ncbi.nlm.nih.gov/gene/55800">http://www.ncbi.nlm.nih.gov/gene/55800</a>     |
| <i>SCN4B</i>    | 11q23.3   | NG_011710.1  | NC_000011.9 (118004092..118023630, complement)  | <a href="http://www.ncbi.nlm.nih.gov/gene/6330">http://www.ncbi.nlm.nih.gov/gene/6330</a>       |
| <i>SCN5A</i>    | 3p21      | NG_008934.1  | NC_000003.11 (38589553..38691164, complement)   | <a href="http://www.ncbi.nlm.nih.gov/gene/6331">http://www.ncbi.nlm.nih.gov/gene/6331</a>       |
| <i>SCO2</i>     | 22q13.33  | NG_016235.1  | NC_000022.11 (50523568..50526439, complement)   | <a href="https://www.ncbi.nlm.nih.gov/gene/9997">https://www.ncbi.nlm.nih.gov/gene/9997</a>     |
| <i>SCRIB</i>    | 8q24.3    | NG_030583.1  | NC_000008.11 (143790920..143815379, complement) | <a href="https://www.ncbi.nlm.nih.gov/gene/23513">https://www.ncbi.nlm.nih.gov/gene/23513</a>   |
| <i>SDHA</i>     | 5p15.33   | NG_012339.1  | NC_000005.10 (218223..264816)                   | <a href="https://www.ncbi.nlm.nih.gov/gene/6389">https://www.ncbi.nlm.nih.gov/gene/6389</a>     |
| <i>SDHAF1</i>   | 19q13.12  | NG_016869.1  | NC_000019.10 (35995188..35996318)               | <a href="https://www.ncbi.nlm.nih.gov/gene/644096">https://www.ncbi.nlm.nih.gov/gene/644096</a> |
| <i>SDHB</i>     | 1p36.13   | NG_012340.1  | NC_000001.11 (17018722..17054170, complement)   | <a href="https://www.ncbi.nlm.nih.gov/gene/6390">https://www.ncbi.nlm.nih.gov/gene/6390</a>     |
| <i>SDS</i>      | 12q24.13  | NC_000012.12 | NC_000012.12 (113392445..113403887, complement) | <a href="https://www.ncbi.nlm.nih.gov/gene/10993">https://www.ncbi.nlm.nih.gov/gene/10993</a>   |
| <i>SGCD</i>     | 5q33-q34  | NG_008693.2  | NC_000005.9 (155462147..156194799)              | <a href="http://www.ncbi.nlm.nih.gov/gene/6444">http://www.ncbi.nlm.nih.gov/gene/6444</a>       |
| <i>SLC22A5</i>  | 5q31.1    | NG_008982.2  | NC_000005.10 (132369704..132395614)             | <a href="https://www.ncbi.nlm.nih.gov/gene/6584">https://www.ncbi.nlm.nih.gov/gene/6584</a>     |
| <i>SLC25A20</i> | 3p21.31   | NG_008171.1  | NC_000003.12 (48856923..48898993, complement)   | <a href="https://www.ncbi.nlm.nih.gov/gene/788">https://www.ncbi.nlm.nih.gov/gene/788</a>       |
| <i>SLC25A4</i>  | 4q35      | NG_013001.1  | NC_000004.11 (186064417..186071538)             | <a href="http://www.ncbi.nlm.nih.gov/gene/291">http://www.ncbi.nlm.nih.gov/gene/291</a>         |
| <i>SLC25A4</i>  | 4q35.1    | NG_013001.1  | NC_000004.12 (185143263..185150384)             | <a href="https://www.ncbi.nlm.nih.gov/gene/291">https://www.ncbi.nlm.nih.gov/gene/291</a>       |
| <i>SLC25A5</i>  | Xq24      | NG_013262.1  | NC_000023.11 (119468400..119471396)             | <a href="https://www.ncbi.nlm.nih.gov/gene/292">https://www.ncbi.nlm.nih.gov/gene/292</a>       |
| <i>SLC52A2</i>  | 8q24.3    | NG_032872.1  | NC_000008.11 (144358547..144361286)             | <a href="https://www.ncbi.nlm.nih.gov/gene/79581">https://www.ncbi.nlm.nih.gov/gene/79581</a>   |
| <i>SMAD3</i>    | 15q22.33  | NG_011990.1  | NC_000015.9 (67358036..67487533)                | <a href="http://www.ncbi.nlm.nih.gov/gene/4088">http://www.ncbi.nlm.nih.gov/gene/4088</a>       |
| <i>SMAD7</i>    | 18q21.1   | NG_023330.1  | NC_000018.10 (48919853..48950711, complement)   | <a href="https://www.ncbi.nlm.nih.gov/gene/4092">https://www.ncbi.nlm.nih.gov/gene/4092</a>     |
| <i>SMARCA4</i>  | 19p13.2   | NG_011556.2  | NC_000019.10 (10960922..11062282)               | <a href="https://www.ncbi.nlm.nih.gov/gene/6597">https://www.ncbi.nlm.nih.gov/gene/6597</a>     |
| <i>SNTA1</i>    | 20q11.2   | NG_011622.1  | NC_000020.10 (31995763..32031698, complement)   | <a href="http://www.ncbi.nlm.nih.gov/gene/6640">http://www.ncbi.nlm.nih.gov/gene/6640</a>       |
| <i>SOS1</i>     | 2p21      | NG_007530.1  | NC_000002.11 (39208690..39347686, complement)   | <a href="http://www.ncbi.nlm.nih.gov/gene/6654">http://www.ncbi.nlm.nih.gov/gene/6654</a>       |
| <i>SQSTM1</i>   | 5q35.3    | NG_011342.1  | NC_000005.10 (179806388..179838078)             | <a href="https://www.ncbi.nlm.nih.gov/gene/8878">https://www.ncbi.nlm.nih.gov/gene/8878</a>     |
| <i>STARD3</i>   | 17q11-q12 |              | NC_000017.10 (37793333..37820454)               | <a href="http://www.ncbi.nlm.nih.gov/gene/10948">http://www.ncbi.nlm.nih.gov/gene/10948</a>     |

|               |          |              |                                                 |                                                                                                 |
|---------------|----------|--------------|-------------------------------------------------|-------------------------------------------------------------------------------------------------|
| <i>TAZ</i>    | Xq28     | NG_009634.1  | NC_000023.10 (153639877..153650065)             | <a href="http://www.ncbi.nlm.nih.gov/gene/6901">http://www.ncbi.nlm.nih.gov/gene/6901</a>       |
| <i>TBX20</i>  | 7p14.2   | NG_015805.1  | NC_000007.14 (35199936..35254100, complement)   | <a href="https://www.ncbi.nlm.nih.gov/gene/57057">https://www.ncbi.nlm.nih.gov/gene/57057</a>   |
| <i>TBX5</i>   | 12q24.1  | NG_007373.1  | NC_000012.11 (114791735..114846247, complement) | <a href="http://www.ncbi.nlm.nih.gov/gene/6910">http://www.ncbi.nlm.nih.gov/gene/6910</a>       |
| <i>TCAP</i>   | 17q12    | NG_008892.1  | NC_000017.11 (39665346..39666554)               | <a href="https://www.ncbi.nlm.nih.gov/gene/8557">https://www.ncbi.nlm.nih.gov/gene/8557</a>     |
| <i>TGFB3</i>  | 14q24.3  | NG_011715.1  | NC_000014.9 (75958061..75983011, complement)    | <a href="https://www.ncbi.nlm.nih.gov/gene/7043">https://www.ncbi.nlm.nih.gov/gene/7043</a>     |
| <i>TGFBR1</i> | 9q22     | NG_007461.1  | NC_000009.11 (101867412..101916474)             | <a href="http://www.ncbi.nlm.nih.gov/gene/7046">http://www.ncbi.nlm.nih.gov/gene/7046</a>       |
| <i>TGFBR2</i> | 3p22     | NG_007490.1  | NC_000003.11 (30647994..30735634)               | <a href="http://www.ncbi.nlm.nih.gov/gene/7048">http://www.ncbi.nlm.nih.gov/gene/7048</a>       |
| <i>TMEM43</i> | 3p25.1   | NG_008975.1  | NC_000003.11 (14166440..14185180)               | <a href="http://www.ncbi.nlm.nih.gov/gene/79188">http://www.ncbi.nlm.nih.gov/gene/79188</a>     |
| <i>TMEM70</i> | 8q21.11  | NG_016618.1  | NC_000008.11 (73976142..73982783)               | <a href="https://www.ncbi.nlm.nih.gov/gene/54968">https://www.ncbi.nlm.nih.gov/gene/54968</a>   |
| <i>TNNC1</i>  | 3p21.1   | NG_008963.1  | NC_000003.11 (52485107..52488057, complement)   | <a href="http://www.ncbi.nlm.nih.gov/gene/7134">http://www.ncbi.nlm.nih.gov/gene/7134</a>       |
| <i>TNNI3</i>  | 19q13.4  | NG_007866.2  | NC_000019.9 (55663135..55669100, complement)    | <a href="http://www.ncbi.nlm.nih.gov/gene/7137">http://www.ncbi.nlm.nih.gov/gene/7137</a>       |
| <i>TNNT2</i>  | 1q32     | NG_007556.1  | NC_000001.10 (201328136..201346836, complement) | <a href="http://www.ncbi.nlm.nih.gov/gene/7139">http://www.ncbi.nlm.nih.gov/gene/7139</a>       |
| <i>TPM1</i>   | 15q22.1  | NG_007557.1  | NC_000015.9 (63334838..63364114)                | <a href="http://www.ncbi.nlm.nih.gov/gene/7168">http://www.ncbi.nlm.nih.gov/gene/7168</a>       |
| <i>TTN</i>    | 2q31.2   | NG_011618.3  | NC_000002.12 (178525989..178807423, complement) | <a href="https://www.ncbi.nlm.nih.gov/gene/7273">https://www.ncbi.nlm.nih.gov/gene/7273</a>     |
| <i>TTR</i>    | 18q12.1  | NG_009490.1  | NC_000018.10 (31591767..31599024)               | <a href="https://www.ncbi.nlm.nih.gov/gene/7276">https://www.ncbi.nlm.nih.gov/gene/7276</a>     |
| <i>VANGL2</i> | 1q23.2   | NG_023420.1  | NC_000001.11 (160400574..160428678)             | <a href="https://www.ncbi.nlm.nih.gov/gene/57216">https://www.ncbi.nlm.nih.gov/gene/57216</a>   |
| <i>VCL</i>    | 10q22.2  | NG_008868.1  | NC_000010.10 (75757836..75879918)               | <a href="http://www.ncbi.nlm.nih.gov/gene/7414">http://www.ncbi.nlm.nih.gov/gene/7414</a>       |
| <i>YAPI</i>   | 11q22.1  | NG_029530.1  | NC_000011.10 (102109957..102233423)             | <a href="https://www.ncbi.nlm.nih.gov/gene/10413">https://www.ncbi.nlm.nih.gov/gene/10413</a>   |
| <i>YWHAE</i>  | 17p13.3  | NG_009233.1  | NC_000017.11 (1344539..1400262, complement)     | <a href="https://www.ncbi.nlm.nih.gov/gene/7531">https://www.ncbi.nlm.nih.gov/gene/7531</a>     |
| <i>ZNF25</i>  | 10p11.21 | NC_000010.11 | NC_000010.11 (37949572..37976655, complement)   | <a href="https://www.ncbi.nlm.nih.gov/gene/219749">https://www.ncbi.nlm.nih.gov/gene/219749</a> |



**Table S2. Silico predictive algorithms used in the study.**

| Category                                    | Basis                                                                                         | Name            | Website                                                                                 | Prediction Threshold                                      |
|---------------------------------------------|-----------------------------------------------------------------------------------------------|-----------------|-----------------------------------------------------------------------------------------|-----------------------------------------------------------|
| Missense prediction                         | Evolutionary conservation                                                                     | SIFT            | <a href="http://sift.jevl.org">http://sift.jevl.org</a>                                 | <0.05 Deleterious<br>>0.05 Tolerated                      |
| Missense prediction                         | Protein structure/function and evolutionary conservation                                      | Align GVGD      | <a href="http://agvgd.iarc.fr/agvgd_input.php">http://agvgd.iarc.fr/agvgd_input.php</a> | ≥ C15 Probably Damaging                                   |
|                                             |                                                                                               | Mutation Taster | <a href="http://www.mutationtaster.org">http://www.mutationtaster.org</a>               | Disease causing                                           |
|                                             |                                                                                               | Polyphen-2      | <a href="http://genetics.bwh.harvard.edu/pph2">http://genetics.bwh.harvard.edu/pph2</a> | 0.85 to 1 Probably Damage<br>0.15 to 0.85 Possibly Damage |
| Missense and insertion/deletions prediction | Contrasts annotations of fixed/nearly fixed derived alleles in humans with simulated variants | CADD            | <a href="http://cadd.gs.washington.edu">http://cadd.gs.washington.edu</a>               | ≥ 20 1% most deleterious<br>≥ 30 0.1% most deleterious    |

**Reference**

1. Richards S, Aziz N, Bale S, Bick D, Das S, Gastier-Foster J, Grody WW, Hegde M, Lyon E, Spector E, Voelkerding K, Rehm HL. Standards and guidelines for the interpretation of sequence variants: a joint consensus recommendation of the American College of Medical Genetics and Genomics and the association for molecular autopsy. Genet Med 2015;17:405–423.

**Table S3. Variant identified in the patient**

| Gene          | Protein   | NM_004387.1    | dbSNP | gnomAD | HGVD | SIFT | polyphen2 | GVGD | Mutation<br>Taster | CADD | Clin Var | ACMG<br>classification |
|---------------|-----------|----------------|-------|--------|------|------|-----------|------|--------------------|------|----------|------------------------|
| <i>NKX2-5</i> | p.Phe86fs | c.255_256delCT | n/a   | n/a    | n/a  | n/a  | n/a       | n/a  | n/a                | 28.7 | n/a      | PM2                    |
